# Supplementary material for: Sustainability Trends in Humanitarian Architecture Research: A Bibliometric Analysis
Source: MDPI journal article supplement (doi:10.3390/su151411430), 2023-07-23
Supplement: s1 [file s1]

Archive with 2 entries (2 files):
- Supplementary Material 1- Sustainability Trends in Humanitarian Architecture.pdf
- Supplementary Material 2- Sustainability Trends in Humanitarian Architecture.pdf
