# Supplementary material for: Sustainability Trends in Humanitarian Architecture Research: A Bibliometric Analysis
Source: MDPI journal article supplement (doi:10.3390/su151411430), 2023-07-23
Supplement: s1 [file s1]

Supplementary material for the article titled:

## Sustainability Trends in Humanitarian Architecture Research: A Bibliometric Analysis

**Table S2.** The top 20 keywords in each period based on their number of occurrences.

|   | 1982-2002                           |             | 2003-2012               |             | 2013-2017               |             | 2018-2022           |             |
|---|-------------------------------------|-------------|-------------------------|-------------|-------------------------|-------------|---------------------|-------------|
|   | Keyword                             | Occurrences | Keyword                 | Occurrences | Keyword                 | Occurrences | Keyword             | Occurrences |
| 1 | developing country                  | 2           | emergency shelter       | 11          | disasters               | 11          | emergency shelter   | 75          |
| 2 | migration                           | 2           | human                   | 10          | sustainable development | 8           | human               | 55          |
| 3 | residential mobility                | 2           | disaster                | 9           | emergency shelter       | 7           | humans              | 41          |
| 4 | accident prevention                 | 1           | reconstruction          | 8           | sustainability          | 7           | disasters           | 33          |
| 5 | acquired immune deficiency syndrome | 1           | sustainable development | 8           | post disasters          | 6           | adult               | 24          |
| 6 | acquired immunodeficiency syndrome  | 1           | disaster planning       | 7           | costs                   | 5           | female              | 23          |
| 7 | adult                               | 1           | disaster prevention     | 6           | design                  | 5           | disaster management | 22          |

|    |                                        |   |                                   |   |                                 |   |                            |    |
|----|----------------------------------------|---|-----------------------------------|---|---------------------------------|---|----------------------------|----|
| 8  | arch supported<br>membrane<br>shelters | 1 | earthquakes                       | 6 | human                           | 5 | male                       | 21 |
| 9  | arches                                 | 1 | housing                           | 6 | shelter                         | 5 | disaster                   | 20 |
| 10 | asia                                   | 1 | disasters                         | 5 | article                         | 4 | disaster<br>planning       | 19 |
| 11 | behavior                               | 1 | natural<br>disaster               | 5 | construction                    | 4 | covid-19                   | 18 |
| 12 | bembidion<br>confusum                  | 1 | adaptation,<br>psychological      | 4 | environmental<br>impact         | 4 | housing                    | 17 |
| 13 | building material                      | 1 | adult                             | 4 | humans                          | 4 | controlled<br>study        | 16 |
| 14 | china                                  | 1 | female                            | 4 | life cycle                      | 4 | sustainability             | 15 |
| 15 | community<br>involvement               | 1 | organization<br>and<br>management | 4 | post-disaster<br>reconstruction | 4 | sustainable<br>development | 15 |
| 16 | community<br>resilience                | 1 | shelters (civil<br>defense)       | 4 | structural<br>design            | 4 | earthquake                 | 14 |
| 17 | consumer                               | 1 | united states                     | 4 | sustainability<br>assessment    | 4 | earthquakes                | 14 |
| 18 | consumer<br>participation              | 1 | adaptive<br>behavior              | 3 | sustainable<br>construction     | 4 | natural<br>disasters       | 14 |
| 19 | demographic<br>factors                 | 1 | aged                              | 3 | architectural<br>design         | 3 | shelter                    | 14 |

|    |            |   |                        |   |              |   |                    |    |
|----|------------|---|------------------------|---|--------------|---|--------------------|----|
| 20 | demography | 1 | disaster<br>management | 3 | architecture | 3 | decision<br>making | 13 |
|----|------------|---|------------------------|---|--------------|---|--------------------|----|
