# Supplementary material for: Sustainability Trends in Humanitarian Architecture Research: A Bibliometric Analysis
Source: MDPI journal article supplement (doi:10.3390/su151411430), 2023-07-23
Supplement: s1 [file s1 › Supplementary Material 1- Sustainability Trends in Humanitarian Architecture.pdf]

Supplementary material for the article titled:

## **Sustainability Trends in Humanitarian Architecture Research: A Bibliometric Analysis**

**Table S1.** Top 25 most frequently occurred Keywords

| Keyword                     | Occurrences | Total link strength |
|-----------------------------|-------------|---------------------|
| emergency shelter           | 136         | 686                 |
| human                       | 110         | 749                 |
| article                     | 86          | 566                 |
| humans                      | 84          | 626                 |
| disasters                   | 78          | 364                 |
| disaster                    | 57          | 347                 |
| female                      | 45          | 357                 |
| disaster planning           | 44          | 304                 |
| adult                       | 38          | 308                 |
| male                        | 36          | 306                 |
| disaster management         | 35          | 155                 |
| sustainable development     | 35          | 83                  |
| housing                     | 34          | 177                 |
| earthquakes                 | 31          | 169                 |
| earthquake                  | 30          | 195                 |
| shelter                     | 29          | 155                 |
| sustainability              | 28          | 68                  |
| natural disaster            | 27          | 157                 |
| organization and management | 25          | 178                 |
| middle aged                 | 23          | 216                 |
| aged                        | 22          | 210                 |
| priority journal            | 22          | 163                 |
| hurricane                   | 21          | 170                 |
| united states               | 21          | 150                 |
